# Supplementary material for: Ago-RIP Sequencing Identifies New MicroRNA-449a-5p Target Genes Increasing Sorafenib Efficacy in Hepatocellular Carcinoma
Source: PubMed Central journal article supplement (PMC8692677; doi:10.7150/jca.66016), 2022-01-01
Supplement: jcav13p0062s1.pdf [file jcav13p0062s1.pdf]

## Supplementary data

### **Ago-RIP Sequencing Identifies New MicroRNA-449a-5p Target Genes Increasing Sorafenib Sensitivity in Hepatocellular Carcinoma**

Thea Reinkens, Amelie Stalke, Nicole Hüge, Beate Vajen, Marlies Eilers, Vera Schäffer, Oliver Dittrich-Breiholz, Brigitte Schlegelberger, Thomas Illig, Britta Skawran<sup>1</sup>

<sup>1</sup> **Corresponding author**, Department of Human Genetics, Hannover Medical School, Carl-Neuberg-Straße 1, 30625 Hannover, Germany, email: Skawran.britta@mh-hannover.de

|                                                                                                                                   |           |
|-----------------------------------------------------------------------------------------------------------------------------------|-----------|
| <b>Supplementary materials and methods</b> .....                                                                                  | <b>2</b>  |
| Cell culture and transfection .....                                                                                               | 2         |
| MiRNA mimics and siRNA Pools for transfection .....                                                                               | 2         |
| Library generation, sequencing, and raw data processing .....                                                                     | 3         |
| Library generation, quality control, and quantification: .....                                                                    | 3         |
| Library denaturation and Sequencing run: .....                                                                                    | 3         |
| BCL to FASTQ conversion: .....                                                                                                    | 3         |
| Raw data processing and quality control: .....                                                                                    | 4         |
| Normalization and relative RNA enrichment analysis:.....                                                                          | 4         |
| Luciferase reporter assay .....                                                                                                   | 4         |
| Tube formation assay .....                                                                                                        | 5         |
| Taqman Assays for quantitative real-time PCR .....                                                                                | 5         |
| Antibodies for western blotting .....                                                                                             | 6         |
| Antibodies for Ago2 RNA immunoprecipitation. ....                                                                                 | 7         |
| Buffer for Ago2 RNA immunoprecipitation:.....                                                                                     | 7         |
| gblocks for cloning luciferase reporter vectors.....                                                                              | 8         |
| <b>Supplementary Figures</b> .....                                                                                                | <b>13</b> |
| Suppl. Fig. 1. siPOOL establishment of siPEA15, siPPP1CA and siTUFT1.....                                                         | 13        |
| Suppl. Fig. 2. MiR-449a-5p and knockdown of <i>PEA15</i> , <i>PPP1CA</i> and <i>TUFT1</i> increase sorafenib efficacy in HCC..... | 15        |
| <b>Supplementary Tables</b> .....                                                                                                 | <b>16</b> |
| Supplementary Table 1. Potential miR-449a-5p target genes identified by Ago-RIP-Seq .....                                         | 16        |
| <b>References</b> .....                                                                                                           | <b>18</b> |

## Supplementary materials and methods

### Cell culture and transfection

HCC cell lines, HLE and Huh7, were kindly provided by Professor Nam-Ho Huh (Department of Cell Biology, Graduate School of Medicine, Dentistry and Pharmaceutical Sciences, Okayama University, Okayama, Japan) and cultured in Dulbecco's Modified Eagle Medium (DMEM) containing 10% FCS, 2mM L-glutamine and 100 U/mL penicillin/streptomycin. Human umbilical vein endothelial cells (HUVECs, pooled donors) were obtained from Lonza and cultured in Endothelial Basal Medium-2 (EBM-2) with supplements (Lonza, Basel, Switzerland). Human embryonic kidney cells (HEK293T) were cultured in DMEM containing 10% FCS, 100 U/mL penicillin/streptomycin, 3,7 g/l sodium hydrogen carbonate, 3,7 g/l D-Glucose und 1 mM sodium pyruvate. All cell lines were cultured at 37°C and 5 % CO<sub>2</sub> in a humidified incubator. Cells were transfected with 50 nM miR-449a-5p mimics (Qiagen) or 3 nM siPOOLs (siTOOLS Biotech) against *PEA15*, *PPP1CA* or *TUFT1* using HiPerFect Transfection Reagent (Qiagen). Allstars Negative Control (Qiagen) was used as non-targeting miR-control or siRNA-control. SiPOOLs against *PEA15*, *PPP1CA* or *TUFT1* were either single transfected (3 nM) or co-transfected in equimolar amounts. The medium was changed 24 h after transfection. For analysis of sorafenib-induced apoptosis, cells were treated with 10 µM sorafenib [1] or DMSO vehicle control 24h after transfection.

### MiRNA mimics and siRNA Pools for transfection.

| Oligonucleotide           | Order no./ ID            | Manufacturer                          |
|---------------------------|--------------------------|---------------------------------------|
| Allstars Negative Control | SI03650318               | Qiagen, Hilden, Germany               |
| Syn-hsa-miR-449a          | MSY0001541               | Qiagen, Hilden, Germany               |
| siPOOL Negative Control   | siPOOL Negative Control  | siTOOLS Biotech, Martinsried, Germany |
| siPOOL PEA15              | siPOOL 8682 PEA15 human  | siTOOLS Biotech, Martinsried, Germany |
| siPOOL PPP1CA             | siPOOL 5499 PPP1CA human | siTOOLS Biotech, Martinsried, Germany |
| siPOOL TUFT1              | siPOOL 7286 TUFT1 human  | siTOOLS Biotech, Martinsried, Germany |

### Ago2 RNA immunoprecipitation (Ago2-IP)

For Ago2-IP, miR-449a-5p or microRNA negative control transfected HLE cells ( $1 \times 10^7$ ) were lysed in 3x NP40 lysis buffer, incubated for 20 min on ice and centrifuged (15 min, 13.000 x g, 4 °C). 20 µl of the supernatant were stored for the input control. Dynabeads Protein G (Invitrogen, Carlsbad, USA) were prepared by 3 x washing with citrate buffer. Afterwards, 10 µg Ago2 antibody (Chromotek, Planegg-Martinsried, Germany) or 10 µg IgG isotype control (Chromotek) were coupled to the beads for 1 h at 4 °C. IP of the lysates was performed for 1 h rotating at 4 °C followed by three washing steps with IP wash buffer and high salt buffer and

two washing steps with phosphatase wash buffer and PNK buffer. RNA was isolated using 350  $\mu$ l TRI Reagent (Zymo Research, Freiburg, Germany) followed by the Direct-zol RNA MiniPrep Kit (Zymo Research). As quality controls, microRNA levels were measured in the total lysate, supernatant, and pulldown fractions by quantitative real-time PCR. Ago-IPs were performed in three independent biological replicates

## **Library generation, sequencing, and raw data processing**

### *Library generation, quality control, and quantification:*

Purified RNAs of the Ago, IgG and Input fractions were quantified using a Qubit fluorometer and the quality was assessed by an Agilent Bioanalyzer 2100 using RNA picoChips. 10 ng of RNA were treated with *DNaseI* (Qiagen, Hilden, Germany). 8  $\mu$ l of Ago2-IP sample or 100pg of total RNA input material were utilized for cDNA library generation using 'NEBNext<sup>®</sup> Single Cell / Low Input RNA Library Prep Kit for Illumina<sup>®</sup>' (E6420S; New England Biolabs). All steps were performed as recommended in user manual E6420 (Version 1.0\_04-2018; NEB) except that just half of the RT reaction products were used and accordingly all reactions were downscaled to 1/2 of initial volumes starting from cDNA amplification (point 2.4. of the manual). cDNA amplification was performed with 15 pcr cycles for input material and 17 cycles for RIP samples.

250pg of each amplified cDNA were used for fragmentation / end prep and adaptor ligation. After cleanup, processed cDNA samples were barcoded by single indexing approach, using 'NEBNext Multiplex Oligos for Illumina' (Index Primer A001-A013; A015-A021), applying 9 cycles of final pcr.

Fragment length distribution of amplified cDNA samples and individual libraries was monitored using 'Bioanalyzer High Sensitivity DNA Assay' (5067-4626; Agilent Technologies). Quantification of libraries was performed by use of the 'Qubit<sup>®</sup> dsDNA HS Assay Kit' (Q32854; ThermoFisher Scientific).

### *Library denaturation and Sequencing run:*

Equal molar amounts of nineteen individually barcoded libraries were pooled. Accordingly, each analyzed library constitutes 5.3% of overall flowcell capacity. The library pool was denatured with NaOH and was finally diluted to 1.8pM according to the Denature and Dilute Libraries Guide (Document # 15048776 v02; Illumina). 1.3 ml of denatured pool was loaded on an Illumina NextSeq 550 sequencer using a High Output Flowcell for single reads (20024906; Illumina). Sequencing was performed with the following settings: Sequence read 1 with 76 bases; Index read 1 with 6 bases.

### *BCL to FASTQ conversion:*

BCL files were converted to FASTQ files using bcl2fastq Conversion Software version v2.20.0.422 (Illumina).

#### *Raw data processing and quality control:*

Raw data processing was conducted by use of nfcore/rnaseq (version 1.3) which is a bioinformatics best-practice analysis pipeline used for RNA sequencing data at the National Genomics Infrastructure at SciLifeLab Stockholm, Sweden. The pipeline uses Nextflow, a bioinformatics workflow tool. It pre-processes raw data from FastQ inputs, aligns the reads and performs extensive quality-control on the results. The genome reference and annotation data were taken from GENCODE.org (Homo sapiens; GRCh38; release 29).

#### *Normalization and relative RNA enrichment analysis:*

Normalization was performed with DESeq2 (Galaxy Tool Version 2.11.40.2) with default settings except for “Output normalized counts table” which was set to “Yes”. Relative RNA enrichment analysis and Wald statistics regarding the contrast C1 were also conducted using DESeq2. Resulting p-values were adjusted according to the approach recommended by Benjamini and Hochberg and used as an additional filter criterion (Fig. 1B).

#### ***Statistical modeling and analysis of Ago-RIP sequencing (Ago-RIP-Seq)***

The identification of direct miR-449a-5p targets was achieved by using the concept of linear contrasts [12]. Following miR-449a-5p overexpression, the fraction of miR-449a-5p and its target genes is increased in the Ago complex. To reduce the noise due to unspecific RNA binding to the Protein G beads in the Ago-RIP-Seq experiment, the Ago-IP fractions were adjusted to IgG-IP [Contrast 1, C1] before comparing the Ago-IP fractions of miR-449a-5p with the Ago-IP of miR-control as follows:

$$[\text{Contrast 1}] = (\text{Ago}_{\text{miR-449a}} - \text{IgG}_{\text{miR-449a}}) - (\text{Ago}_{\text{miR-Ctrl}} - \text{IgG}_{\text{miR-Ctrl}})$$

Since miR-449a-5p overexpression leads to widespread secondary changes within the gene expression profiles that might impact the profiles of immunoprecipitation [12], it was necessary to adjust the levels of RNAs detected in the Ago-IP fractions to their expression levels measured in the total lysates (=Input) [Contrast 2, C2] as follows:

$$[\text{Contrast 2}] = (\text{Ago}_{\text{miR-449a}} - \text{Input}_{\text{miR-449a}}) - (\text{Ago}_{\text{miR-Ctrl}} - \text{Input}_{\text{miR-Ctrl}})$$

As microRNA targets are decreased after miR-449a-5p expression, the comparison [Contrast 3, C3] for identifying whole transcriptional changes was defined as follows:

$$[\text{Contrast 3}] = (\text{Input}_{\text{miR-449a}} - \text{Input}_{\text{miR-Ctrl}})$$

The contrasts C1, C2 and C3 define the type of comparison between factor levels. Wald-tests were applied for testing against zero.

#### **Luciferase reporter assay**

Potential miR-449a-5p binding sites in the 3'UTR of *PEA15*, *PPP1CA* and *TUFT1* were identified by TargetScan [2] or IntaRNA [3]. GBLOCKS™ Gene Fragments (Integrated DNA Technologies) of 1916 bp (*PEA15*), 377 bp (*PPP1CA*) or 1902 bp (*TUFT1*) length were purchased containing wildtype or mutated miR-449a-5p binding sites, respectively. All gBlocks DNA fragments were

digested with *Xba*I and *Fse*I and cloned downstream of firefly luciferase into the pGL3-Promoter vector (Promega). For transfection, 8,000 HEK293T cells were seeded in white 96-well plates. After 24 hours combinations of 20 nM miRNA mimics (miR-Control or miR-449a-5p) and 25 ng luciferase reporter vectors (pGL3-Promoter, pGL3-wt, pGL3-mut) were transfected in triplicate using Lipofectamine 2000 (Life Technologies). For normalization, pGL4.70 (Promega) inserted with an EF1 $\alpha$  promoter at the *Xho*I restriction site upstream of renilla luciferase, was co-transfected in all conditions. Luciferase activities were measured with the DualGlo Luciferase Assay System (Promega) 24 hours after transfection.

### Tube formation assay

24-well plates were coated with 0.250  $\mu$ L Matrigel Basement Membrane Matrix (BD Biosciences, Franklin Lakes, USA) and incubated at 37 °C. After 1 h, 5 x 10<sup>4</sup> HUVECs were seeded on Matrigel and co-cultured with an equivalent number of HLE cells in 500  $\mu$ l EBM-2 medium. Co-cultured HLE cells were seeded in Transwell Permeable Supports (Corning, New York, USA) with a 0.4  $\mu$ m polycarbonate membrane and incubated in the same well with HUVECs. The tube formation ability of HUVECs was imaged after 6 h of co-culture using an inverted light microscope. The number of tubes, segment length, junctions and nodes of the tubular structures was quantified by Angiogenesis Analyzer (ImageJ, [22]).

### Taqman Assays for quantitative real-time PCR

| Target gene | Assay ID      | Manufacturer                         |
|-------------|---------------|--------------------------------------|
| CFL1        | Hs00830568_g1 | Life Technologies, Carlsbad, CA, USA |
| FOSL1       | Hs00759776_s1 | Life Technologies, Carlsbad, CA, USA |
| NDC1        | Hs00917927_m1 | Life Technologies, Carlsbad, CA, USA |
| PEA15       | Hs00269428_m1 | Life Technologies, Carlsbad, CA, USA |
| PPP1CA      | Hs00267568_m1 | Life Technologies, Carlsbad, CA, USA |
| TBP         | Hs00920494_m1 | Life Technologies, Carlsbad, CA, USA |
| TSPAN14     | Hs01012920_m1 | Life Technologies, Carlsbad, CA, USA |
| TUFT1       | Hs01064705_m1 | Life Technologies, Carlsbad, CA, USA |

### Antibodies for western blotting

| Antigen           | Dilution | Order no. | Manufacturer                            |
|-------------------|----------|-----------|-----------------------------------------|
| $\alpha$ -actinin | 1:3000   | 3134      | Cell Signaling Technology, Danvers, USA |
| $\beta$ -actin    | 1:2000   | 3700      | Cell Signaling Technology, Danvers, USA |
| AKT               | 1:1000   | 9272      | Cell Signaling Technology, Danvers, USA |
| ERK 1/2           | 1:1000   | 4695      | Cell Signaling Technology, Danvers, USA |
| GAPDH             | 1:7500   | Sc25778   | Santa Cruz Biotechnology, Dallas, USA   |
| PEA-15            | 1:1000   | 2780      | Cell Signaling Technology, Danvers, USA |
| Phospho-AKT       | 1:1000   | 4060S     | Cell Signaling Technology, Danvers, USA |
| Phospho-ERK 1/2   | 1:2000   | 4370      | Cell Signaling Technology, Danvers, USA |
| PP1CA             | 1:1000   | 2582      | Cell Signaling Technology, Danvers, USA |
| TUFT1             | 1:500    | HPA028112 | Sigma-Aldrich, St. Louis, USA           |

### Antibodies for Ago2 RNA immunoprecipitation.

| Antigen      | Order no. | Manufacturer                            |
|--------------|-----------|-----------------------------------------|
| Ago 2        | 11A9-100  | Chromotek, Planegg-Martinsried, Germany |
| HA-tag (IgG) | 7c9-100   | Chromotek, Planegg-Martinsried, Germany |

### Buffer for Ago2 RNA immunoprecipitation:

#### 1 x NP40 lysis buffer

50 mM Hepes-KOH (pH 7.5)  
150 mM KCl  
2 mM EDTA  
1 mM NaF  
0.05% Igepal  
0.5 mM DTT  
1 x EDTA-free Complete Protease Inhibitor Cocktail

#### Citrat phosphate buffer (pH 5)

25 mM citric acid  
65 mM Na<sub>2</sub>HPO<sub>4</sub>

#### IP wash buffer (pH 7.5)

50 mM Hepes-KOH (pH 7.5)  
300 mM KCl  
0.05% Igepal  
0.5 mM DTT  
1 x EDTA-free Complete Protease Inhibitor Cocktail

#### High salt wash buffer (pH 7.5)

50 mM Hepes-KOH (pH 7.5)  
500 mM KCl  
0.05% Igepal  
0.5 mM DTT  
1 x EDTA-free Complete Protease Inhibitor Cocktail

#### Phosphatase wash buffer

50 mM Tris-HCl (pH 7.5)  
20 mM EGTA  
0.5% Igepal

#### PNK buffer

50 mM Tris-HCl (pH 7.5)

50 mM NaCl

10 mM MgCl<sub>2</sub>

### gBlocks™ for cloning luciferase reporter vectors

(Overhang sequences to generate *Xba*I and *Fse*I restriction sites are indicated in italics. Predicted miR-449a-5p binding sites are underlined, mutated binding sites are indicated in bold. The gBlocks™ were purchased from Integrated DNA Technologies (IDT).

| <b>gBlocks™<br/>Gene<br/>Fragment</b> | <b>Sequence</b>                                                                                                                                                                                                                                                                                                                                                                                                                                                                                                                                                                                                                                                                                                                                                                                                                                                                                                                                                                                                                                                                                                                                                                                                                                                                                                                                                                                                                                                                                                                       |
|---------------------------------------|---------------------------------------------------------------------------------------------------------------------------------------------------------------------------------------------------------------------------------------------------------------------------------------------------------------------------------------------------------------------------------------------------------------------------------------------------------------------------------------------------------------------------------------------------------------------------------------------------------------------------------------------------------------------------------------------------------------------------------------------------------------------------------------------------------------------------------------------------------------------------------------------------------------------------------------------------------------------------------------------------------------------------------------------------------------------------------------------------------------------------------------------------------------------------------------------------------------------------------------------------------------------------------------------------------------------------------------------------------------------------------------------------------------------------------------------------------------------------------------------------------------------------------------|
| PEA15-3'UTR<br>WT<br>(1890 bp)        | <i>ATGATCTCTAGA</i><br>GCAAGGGGGAGGAAGAGGAGGAAGGTTGGACCTTCATCAGACCACTCCCTTCCCC<br>CATCCTCCAGGAGAGGGGGCAAGGGCAACCCACCATCTACCCACTTACTAACCTGGTCCT<br>AACCCCTTACTGTGCGCGTGTGTGTGCGTGTGCGCACGCTCTGGCTGTTTGTCTATATG<br>TCTAGCTCATCTAGTTCCTCTTCTTAAGGGGATGGGGGTAGGGGCTAGGGGAGGGGGCT<br>GAGTTTCCCCACTTTAGGAGGAGGTGGGGCTATTTCTATGCAAATAGAAATCAGCACAT<br>TCCTCCTACTTCCCTTTCCCTCCACTCCCCCATATCTTTAAAGTGTGGAAGCAGAAAGGA<br>CCTGCATTTTCCCTACATTGAGGAGCTGACATAGGGGTAAGGTATGGGAGAGGTAGGTGGA<br>TCCAGGGAAAAGCAGTGGGGACGGAAGGCAAAGAGACCACTCAACCCCCACCTGGAAGGG<br>GCAAAGAAAAGCCAGAGTTCATGTTTGTACTCCTGTGCTGGACTGTTTCCCTGAGTACCA<br>GCAGGTCCCTTTTTGTCTCTCATGGGCCTAGCATAGGTATGAGCCAGGGATCCCTTCCCTG<br>GTCCCTAAGATCAAACCCCATGGAGCAGCCAGCGTTAGATGCCCCACCCACCTGTAATC<br>TGGAGAGACTGTGCTGGGAACATGTACCCTGAGCCTGAGATGGGGATGAGGGCAGAGAG<br>AGGGGAGCCCCCTCTTCCACTCAGTTGTTCCCTACTCAGACTGTTGCACTCTAAACCTAGG<br>GAGGTTGAAGAATGAGACCCTTAGGTTTTAACACGAATCCTGACACCACCATCTATAGGG<br>TCCCAACTTGGTTATTGTAGGCAACCTTCCCTCTCTCCTTGGTGAAGAACATCCCAAGCC<br>AGAAAGAAGTAACTACAGTGTTCCTTTGCACCGATCCCCACCCCAATTCAATCCCGG<br>AAGGGACTTACTTAGGAAACCCTTCTTTACTAGATATCCTGGCCCCCTGGGCTTGTGAAC<br>ACCTCCTAGCCACATCACTACAGTACAGTGAGTGACCCAGCCTCCTGCCTACCCCAAGA<br>TGCCCCCTCCCCACCCTGACCGTGCTAACTGTGTGTACATATATATTCTACATATATGTAT<br>ATTAAACTGCACTGCCATGTCTGCCCTTTTTTGTGGTGTCTAGCATTAACTTATTGTCT<br>AGGCCAGAGCGGGGTGGGAGGGGAATGCCACAGTGAAGGGAGTGGCAGAATCAAATTGC<br>TACATAGTCCAAACAAAAAGAAGGCTTTTTCAAAAAACATTAAATTCACATGCAGTCTC<br>AGAGACTATTTAGACAAAGTTCAAGTTAGGAGCTTTTAGGATGTGGGAGTAAACTTTAA |



|                                            |                                                                                                                                                                                                                                                                                                                                                                                                                                                                                                                                                                                                                                                                                                                                                                                                                                                                                                                                                                                                                                                                                                                                                                                                                                                                                                                                                                                                                                                                                                                                                                                                                                                                                                                                                                                         |
|--------------------------------------------|-----------------------------------------------------------------------------------------------------------------------------------------------------------------------------------------------------------------------------------------------------------------------------------------------------------------------------------------------------------------------------------------------------------------------------------------------------------------------------------------------------------------------------------------------------------------------------------------------------------------------------------------------------------------------------------------------------------------------------------------------------------------------------------------------------------------------------------------------------------------------------------------------------------------------------------------------------------------------------------------------------------------------------------------------------------------------------------------------------------------------------------------------------------------------------------------------------------------------------------------------------------------------------------------------------------------------------------------------------------------------------------------------------------------------------------------------------------------------------------------------------------------------------------------------------------------------------------------------------------------------------------------------------------------------------------------------------------------------------------------------------------------------------------------|
|                                            | <p>TGGGAGGGGAGGGCTGGCTGCTGGAAGAAGGAAGAAGCCAGACTGGTTAGACAGTACTCT<br/> TAACTCCTAGCCCAGCCTAGCGTGCCCTGCCCTCTGGCCACTGCTGCAGACACCTGCCT<br/> TAACACACACACCTCTAGGACTCCACAGTTTTGCCTTAAAGGACCTTCCCAAGTCTCCCT<br/> TTCCCTGTCTGGCTTCTCCCTTAAGAAGAGAGATACTTGTAGAATTGGGTGGGGGGAA<br/> TGAGCATGAACGTCCCTTCCATTTGGGATATGTTACATTAGAGTGAGAGAGAGAATAAGG<br/> AGCCTTTCTTATGGAAGAAATGGGAGAAGAGAGACAGGGTTCTTTTCAGCAGAGTCTAGT<br/> AGTTTTCTCTGTAAGGCAAATAATCTAAAAAGACTAACCTGCCACCCACTCCTTATATT<br/> GCTGTGAGATTGCCCTATCTTGTGCTCTTCTGTCTGCAGTGTGCACGGCCTTGTCTAA<br/> CCCGGAATAAAGGTGATTGATTGTATTGCAACTAA <i>GGCCGGCCATGATC</i></p>                                                                                                                                                                                                                                                                                                                                                                                                                                                                                                                                                                                                                                                                                                                                                                                                                                                                                                                                                                                                                                                                                                                                                                              |
| <p>PEA15-3'UTR<br/> MUT<br/> (1890 bp)</p> | <p><i>ATGATCTCTAGA</i><br/> GCAAGGGGGAGGAAGAGGAGGAAGGTTGGACCTTCATCAGACCACTCCCTTCCCC<br/> CATCCTCCAGGAGAGGGGGCAAGGGCAACCCACCATCTACCCACTTACTAACCTGGTCT<br/> AACCCCTTACTGTGCGCGTGTGTGTGCGTGTGCGCACGCTCTGGCTGTTTGTCTATATG<br/> TCTAGCTCATCTAGTTCCCTCTTCTTAAGGGGATGGGGGTAGGGGCTAGGGGAGGGGGCT<br/> GAGTTTCCCCACTTTAGGAGGAGGTGGGGCTATTTCTATGCAAATAGAAATCAGCACAT<br/> TCCTCCTACTTCCCTTTCCTCCACTCCCCCATATCTTTAAAGTGTGGAAGCAGAAAGGA<br/> CCTGCATTTTCTACATTGAGGAGCTGACATAGGGGTAAGGTATGGGAGAGGTAGGTGGA<br/> TCCAGGGAAAAGCAGTGGGGACGGAAGGCAAAGAGACCACTCAACCCACCTGGAAGGG<br/> GCAAAGAAAAGCCAGAGTTCATGTTTGTACTCCTGTGCTGGACTGTTTCTGAGTACCA<br/> GCAGGTCCCTTTTTGTCTCTCATGGGCCTAGCATAGGTATGAGCCAGGGATCCTTTCTG<br/> GTCCCTAAGATCAAACCCCATGGAGCAGCCAGCGTTAGATGCCCCACCCACCTGTACTC<br/> TGGAGAGACTGTGCTGGGAACATGTACCACTGAGCCTGAGATGGGGATGAGGGCAGAGAG<br/> AGGGGAGCCCCCTTCCACTCAGTTGTTCTACTCAGACTGTTGCACTCTAAACCTAGG<br/> GAGGTTGAAGAATGAGACCCTTAGGTTTTAACACGAATCCTGACACCACCATCTATAGGG<br/> TCCCAACTTGGTTATTGTAGGCAACCTTCCCTCTCTCCTTGGTGAAGAACATCCCAAGCC<br/> AGAAAGACTGGCCATCACTGTGGTTCCCTTTGCACCGATCCCCACCCCAATTCAATCCCGG<br/> AAGGGACTTACTTAGGAAACCCTTCTTTACTAGATATCCTGGCCCCCTGGGCTTGTGAAC<br/> ACCTCCTAGCCACATCACTACAGTACAGTGAGTGACCCAGCCTCCTGCCTACCCCAAGA<br/> TGCCCCCTCCCCACCCTGACCGTGCTAACTGTGTGTACATATATATTCTACATATATGTAT<br/> ATTAAAACGTCAGTAACGTCTGCCCTTTTTTGTGGTGTCTAGCATTAACTTATTGTCT<br/> AGGCCAGAGCGGGGTGGGAGGGGAATGCCACAGTGAAGGGAGTGGCAGAATCAAATTGC<br/> TACATAGTCCAAACAAAAAGAAGGCTTTTTCAAAAAACATTAAATTCACATGCAGTCTC<br/> AGAGACTATTTAGACAAAGTTCAAGTTAGGAGCTTTTAGGATGTGGGAGTAAACTTTAA<br/> TGGGAGGGGAGGGCTGGCTGCTGGAAGAAGGAAGAAGCCAGACTGGTTAGACAGTACTCT<br/> TAACTCCTAGCCCAGCCTAGCGTGCCCTGCCAAGAGTTGACTGTAGGCAGACACCTGCCT<br/> TAACACACACACCTCTAGGACTCCACAGTTTTGCCTTAAAGGACCTTCCCAAGTCTCCCT</p> |

|                                            |                                                                                                                                                                                                                                                                                                                                                                                                                                                                                                                                                                                                                                                                                                                                                                                                                                                                                                                |
|--------------------------------------------|----------------------------------------------------------------------------------------------------------------------------------------------------------------------------------------------------------------------------------------------------------------------------------------------------------------------------------------------------------------------------------------------------------------------------------------------------------------------------------------------------------------------------------------------------------------------------------------------------------------------------------------------------------------------------------------------------------------------------------------------------------------------------------------------------------------------------------------------------------------------------------------------------------------|
|                                            | <p>TTCCCTGTCTGGCTTCTCCCTTAAGAAGAGAGAGATACTTGTAGAATTGGGTGGGGGGAA<br/> TGAGCATGAACGTCCCTTCCATTTGGGATATGTTACATTAGAGTGAGAGAGAGAATAAGG<br/> AGCCTTTCTTATGGAAGAAATGGGAGAAGAGAGACAGGGTTCTTTTCAGCAGAGTCTAGT<br/> AGTTTCTCTGTAAGGCAAATAATCTAAAAAGACTAACCTGCCACCCACTCCTTATATT<br/> GCTGTGAGATTGCCCTATCTTGTGCTCTTCTGTCTGCAGTGTGCACGGCCTTGTCTAA<br/> CCCGGAATAAAGGTGATTGATTGTATTGCAACTAA <i>GGCCGGCCATGATC</i></p>                                                                                                                                                                                                                                                                                                                                                                                                                                                                                                         |
| <b>PPP1CA-3'UTR<br/> WT<br/> (352 bp)</b>  | <p><i>GATATATCTAGA</i><br/> CCCCCGCACACCACCCTGTGCCCCAGATGATGGATTGATTGTACAGAAATCATGCTGCCA<br/> TGCTGGGGGGGGGTCACCCCGACCCCTCAGGCCACCTGTCACGGGGAACATGGAGCCTT<br/> GGTGTATTTTTCTTTCTTTTTTTAATGAATCAATAGCAGCGTCCAGTCCCCCAGGGCTG<br/> CTTCTGCCTGCACCTGCGGTGACTGTGAGCAGGATCCTGGGGCCGAGGCTGCAGCTCAG<br/> GGCAACGGCAGGCCAGGTCTGGGTCTCCAGCCGTGCTTGGCCTCAGGGCTGGCAGCCGG<br/> ATCCTGGGGCAACCCATCTGGTCTCTTGAATAAAGGTCAAAGCTGGATTCTC<br/> <i>GGCCGGCCGATAGT</i></p>                                                                                                                                                                                                                                                                                                                                                                                                                                                          |
| <b>PPP1CA-3'UTR<br/> MUT<br/> (352 bp)</b> | <p><i>ATGATCTCTAGA</i><br/> CCCCCGCACACCACCCTGTGCCCCAGATGATGGATTGATTGTACAGAAATC<b><u>CTTCGGACC</u></b><br/> TGCTGGGGGGGGGTCACCCCGACCCCTCAGGCCACCTGTCACGGGGAACATGGAGCCTT<br/> GGTGTATTTTTCTTTCTTTTTTTAATGAATCAATAGCAGCGTCCAGTCCCCCAGGGCTG<br/> CTTCTGCCTGCACCTGCGGTGACTGTGAGCAGGATCCTGGGGCCGAGGCTGCAGCTCAG<br/> GGCAACGGCAGGCCAGGTCTGGGTCTCCAGCCGTGCTTGGCCTCAGG<b><u>TCGGTCC</u></b>GCCGG<br/> ATCCTGGGGCAACCCATCTGGTCTCTTGAATAAAGGTCAAAGCTGGATTCTC<br/> <i>GGCCGGCCATGATC</i></p>                                                                                                                                                                                                                                                                                                                                                                                                                              |
| <b>TUFT1-3'UTR<br/> WT<br/> (1876 bp)</b>  | <p><i>ATGATCTCTAGA</i><br/> GCTGCCTGGAGATGGTTGCTGCCATTGCTGCTGCCTCTGCCTCGGAGAAGCCCACT<br/> <u>GCCCCGTGGCTGTAACTGCCTTTGACTTCCTGACTGTCCCCTGGCTGCACCCAGG</u><br/> ACTTCGGGCTCCTGTGTCTCACCATTCCCAAGCCCCTGGCCACTCTAAGCTGGGCAGACG<br/> GAGCACGAGCACCTATTCAAGGCACTGCAGCCCTTTGGAAGACATTGTCCTGCAAGCAGG<br/> AGCCAGGGCAATATCTATATTCCTACAGTACTATTTTTCTCTGTAGAGAGCCTCCCTTC<br/> TGTTGTAGACTGGACTCTGGCTGTGCCATAAGCCAGGCCTTCATCAGATTGGGAGAGGTG<br/> ACAAGATTTGCCTCAGCCCTAAAAGCTGGAGACACAGATGTCCAGAGTGATTGGAGAATG<br/> TCCTGGGGGAATGAAGTTCCTTCCACAAACACAGCTCAGTTCTTAGCAACAACTGTTTG<br/> TTTTTCTACTTGTCCATCTGCAGCCTACGCTGCCCTGGCCTCCTGCAGACAGATAGTGG<br/> GGTTACCTGGCAAGGCCTGGTGTGAGAGCCAGTGAACCTAAGCTTTGACTGGGTGGCCTTGT<br/> CTTTCTGGGGAGGAGGAATGTACATTGAGGAGTAGCCTTTTGGGAAAAATTCTCTAG<br/> GGCTACAGACAGTCATGTGTGACTTCTCTCTGCTGTGAAAACCTCCAGAGTCTCTTTAGG<br/> GATTTTCCCTAAGGTGTACCACCAGGCACACCTCAGTCTTCTTGACCCAGAGCCTGAAAA</p> |

|                                            |                                                                                                                                                                                                                                                                                                                                                                                                                                                                                                                                                                                                                                                                                                                                                                                                                                                                                                                                                                                                                                                                                                                                                                                                                                                                                     |
|--------------------------------------------|-------------------------------------------------------------------------------------------------------------------------------------------------------------------------------------------------------------------------------------------------------------------------------------------------------------------------------------------------------------------------------------------------------------------------------------------------------------------------------------------------------------------------------------------------------------------------------------------------------------------------------------------------------------------------------------------------------------------------------------------------------------------------------------------------------------------------------------------------------------------------------------------------------------------------------------------------------------------------------------------------------------------------------------------------------------------------------------------------------------------------------------------------------------------------------------------------------------------------------------------------------------------------------------|
|                                            | <p>CTGTTTTCACTGGGTTCCACCAGTCCCAGCAAATCCTCTTTGTATTTATTTTGCTAAGT<br/> TATTGGTGGTTTTGCTTACATCTCATGATTGATATAATAACCAAAGTTCTATAGCCTTCTC<br/> TTGCAGTATTTGGATTTGCTTGAAACCGGGAAAAGTGTCCCATTAGGCTTGTTAATGTC<br/> AGAGTGACACTATTATGAATCTTTCTCTCCCTTTCTCTGCCTGTTTCTTCTCTCTTTCT<br/> CCTTCAAACCTTGCTCTGCAGCTAAGGAAGGTGAGTCTACTTTCCCTGAGGCTTTGGGGTC<br/> AGAGTATATGTTGTTTGGAGAAAGAGGGCAATCAGGACTCTTCTGGGACCCAGATGAGTT<br/> CTTCACTAGCCCTTCTGAACCCCTTGCTCCATAATTGGTCTTTTATCCTGGCTCTGAATG<br/> ACCCTGCAGGTCATCATGGTTTTCTTTTTTTTATTGTTTTTTTTCTTTTCTGAGACAGAGT<br/> CTCACTCTGTCACCCAGGCTGGAGTGCAGTGGCGCGATCTCAGCTCACTGCAACCTCTGC<br/> CTCCCGGATTTAAGCGATTCTTCTGCCTCAGCCTCCCAGTAGCTGGGACTACAGGTGTG<br/> CCACCACGCCTGGCTGATTTTTGTATTTTTTAGTAGAGATGGGGTTTACCATACTGGCTA<br/> GGCTGGTCTCGAATTCCTGACCTCAGGTGATCCACCCACCTCGGCTTCCCAAAGTGCTAG<br/> GATTATAGGCTTGAGCTACTGCGCCCGGCCATGGTGTTTTTCTTTAGGGCTCTTCTCTAC<br/> AACCTTGAGAAGTAGATAGGCATCAGAGTATGGTACTATAGGAATCAGAAAAATTCAAAA<br/> CAAATGTGGATTAAGTGTTTAGGCTCTATGTGGCTCACGCAGCCAGAATCCTTAAGTCTG<br/> TGTGTTTTCTGTGTCTCAAGACTGGGCTCACATTCTGGCTTTGTCCATAACAATGCTCTGG<br/> GATTTTCAGGGAGTTCCCTCATTGTAAAATGAGGGGGTCAGAGCAGGTGATATCCATGTT<br/> TCTTCCCTTTCTGATATTGTTGTCTGTGGCATATTCTTTGTATGGCGAATTTAATAAATT<br/> ATATTAATGTGTCTCTTTGA<br/> GGCCGGCCATGATC</p> |
| <p>TUFT1-3'UTR<br/> MUT<br/> (1876 bp)</p> | <p>ATGATCTCTAGA<br/> GCTGCCTGGAGATGGTTGCTGCCATTGCTGCTGCCTCTGCCTCGGAGAAGCCAAAT<br/> <b><u>TCAACGGGTGA</u></b>TGTTA<b><u>CCTCGGA</u></b>CTTTGACTTCTGACTGTCCCCTGGCTGCACCCAGG<br/> ACTTCGGGCTCCTGTGTCTCACCATTCCCAAGCCCCTGGCCACTCTAAGCTGGGCAGACG<br/> GAGCACGAGCACCTATTCAAGGCACTGCAGCCCTTTGGAAGACATTGTCCTGCAAGCAGG<br/> AGCCAGGGCAATATCTATATTCCTACAGTACTATTTTTCTCTGTAGAGAGCCTCCCTTC<br/> TGTTGTAGACTGGACTCTGGCTGTGCCATAAGCCAGGCCTTCATCAGATTGGGAGAGGTG<br/> ACAAGATTTGCCTCAGCCCTAAAAGCTGGAGACACAGATGTCCAGAGTGATTGGAGAATG<br/> TCCTGGGGGAATGAAGTTCCCTCCACAAACACAGCTCAGTTCTTAGCAACAACTGTTTG<br/> TTTTTCTACTTGCTCCATCTGCAGCC<b><u>GAAGATTC</u></b>ACTGGCCTCCTGCAGACAGATAGTGG<br/> GGTTACCTGGCAAGGCCTGGTGAGAGCCAGTGAACCTAAGCTTTGACTGGGTGGCCTTGT<br/> CTTTCTGGGGAGGAGGAATGTACATTCAGGGAGTAGCCTTTTGGCGAAAATTCCTCTAG<br/> GGCTACAGACAGTCATGTGTGACTTCTCTCTGCTGTGAAAACCTCCAGAGTCTCTTTAGG<br/> GATTTTCCCTAAGGTGTACCACCAGGCACACCTCAGTCTTCTTGACCCAGAGCCTGAAAA<br/> CTGTTTTCACTGGGTTCCACCAGTCCCAGCAAATCCTCTTTGTATTTATTTTGCTAAGT<br/> TATTGGTGGTTTTGCTTACATCTCATGATTGATATAATAACCAAAGTTCTATAGCCTTCTC</p>                                                                                                                                                                                                  |

TTGCAGTATTTGGATTTGCTTGAAACCGGGAAAACCTGTTCCCATTAGGCTTGTTAATGTC  
AGAGTGACACTATTATGAATCTTTCTCTCCCTTTCCTCTGCCTGTTTCTTCTCTCTTTCT  
CCTTCAAACCTTGCTCTGCAGCTAAGGAAGGTGAGTCTACTTTCCCTGAGGCTTTGGGGTC  
AGAGTATATGTTGTTTGGAGAAAGAGGGCAATCAGGACTCTTCTGGGACCCAGATGAGTT  
CTTCACTAGCCCTTCTGAACCCCTTGCTCCATAATTGGTCTTTTATCCTGGCTCTGAATG  
ACCCTGCAGGTCATCATGGTTTTCTTTTTTATTGTTTTTTTTTTTTTCTGAGACAGAGT  
CTCACTCTGTCACCCAGGCTGGAGTGCAGTGGCGGATCTCAGCTCACTGCAACCTCTGC  
CTCCCGGATTTAAGCGATTCTTCTGCCTCAGCCTCCCGAGTAGCTGGGACTACAGGTGTG  
CCACCACGCCTGGCTGATTTTTGTATTTTTAGTAGAGATGGGGTTTCACCATCCGGTCGA  
GGCTGGTCTCGAATTCCTGACCTCAGGTGATCCACCCACCTCGGCTTCCCAAAGTGCTAG  
GATTATAGGCTTGAGCTACTGCGCCCGGCCCATGGTGTTTTTCTTTAGGGCTCTTCCTAC  
AACCTTGAGAAGTAGATAGGCATCAGAGTATGGTACTATAGGAATCAGAAAAATCAAAA  
CAAATGTGGATTAAGTGTTTAGGCTCTATGTGGCTCACGCAGCCAGAATCCTTAAGTCTG  
TGTGTTTCTGTGTCTCAAGACTGGGCTCACATTCTGGCTTTGTCCATAACAATGCTCTGG  
GATTTCAAGGAGTTCCCTCATTGTAAAATGAGGGGGTCAGAGCAGGTGATATCCATGTT  
TCTTCCCTTCTGATATTGTTGTCTGTGGCATATTCTTTGTATGGCGAATTTAATAAATT  
ATATTAATGTGTCTCTTTGA  
*GGCCGGCCATGATC*

# Supplementary Figures

Suppl. Fig. 1. siPOOL establishment of siPEA15, siPPP1CA and siTUFT1

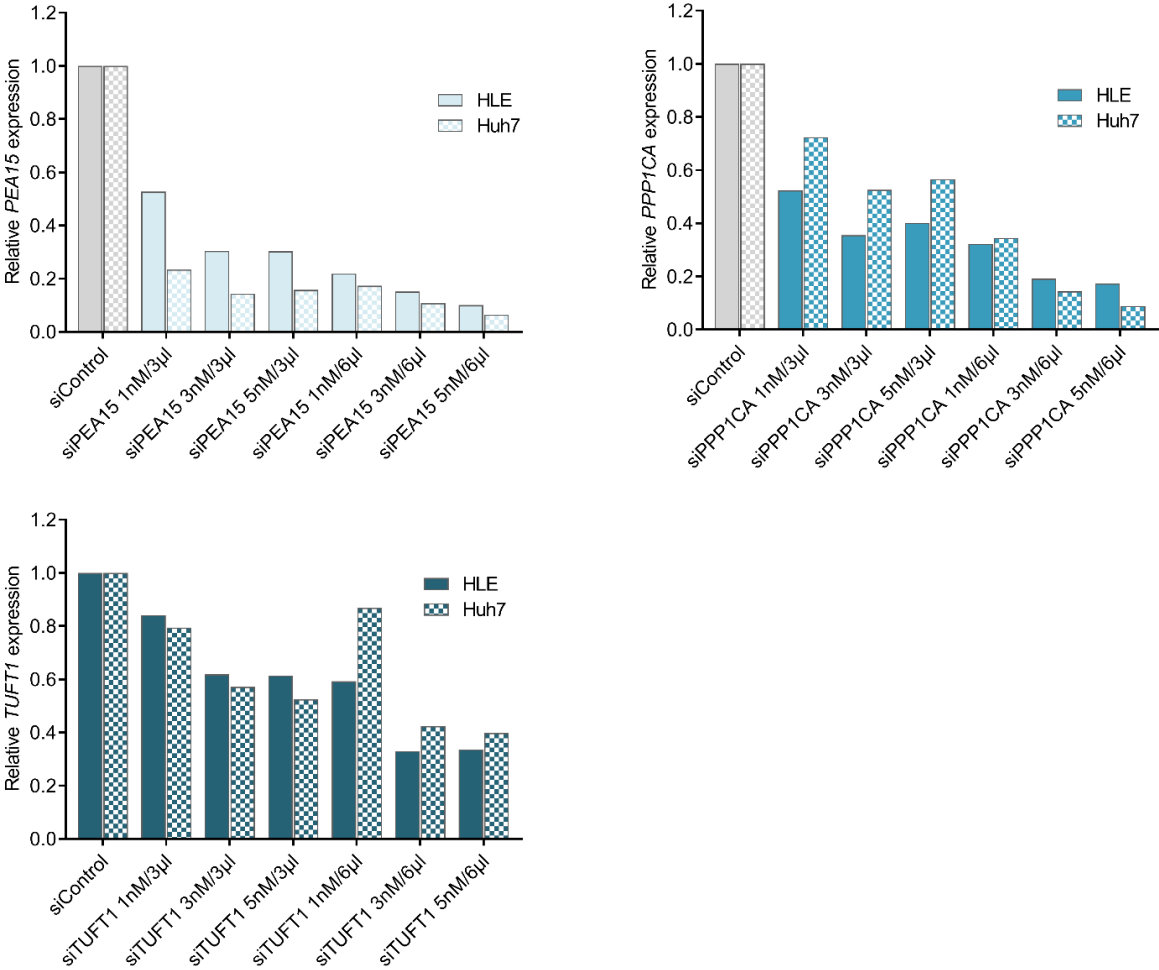

Suppl. Fig. 1. siPOOL establishment of siPEA15, siPPP1CA and siTUFT1

Different siPOOL (siTOOLS Biotech) concentrations were used and siPOOLS were transfected with either 3 µl or 6 µl HiPerFect Transfection Reagent to establish the best condition for RNA knockdown.

Suppl. Fig. 2. MiR-449a and knockdown of *PEA15*, *PPP1CA* and *TUFT1* increase sorafenib efficacy in HCC

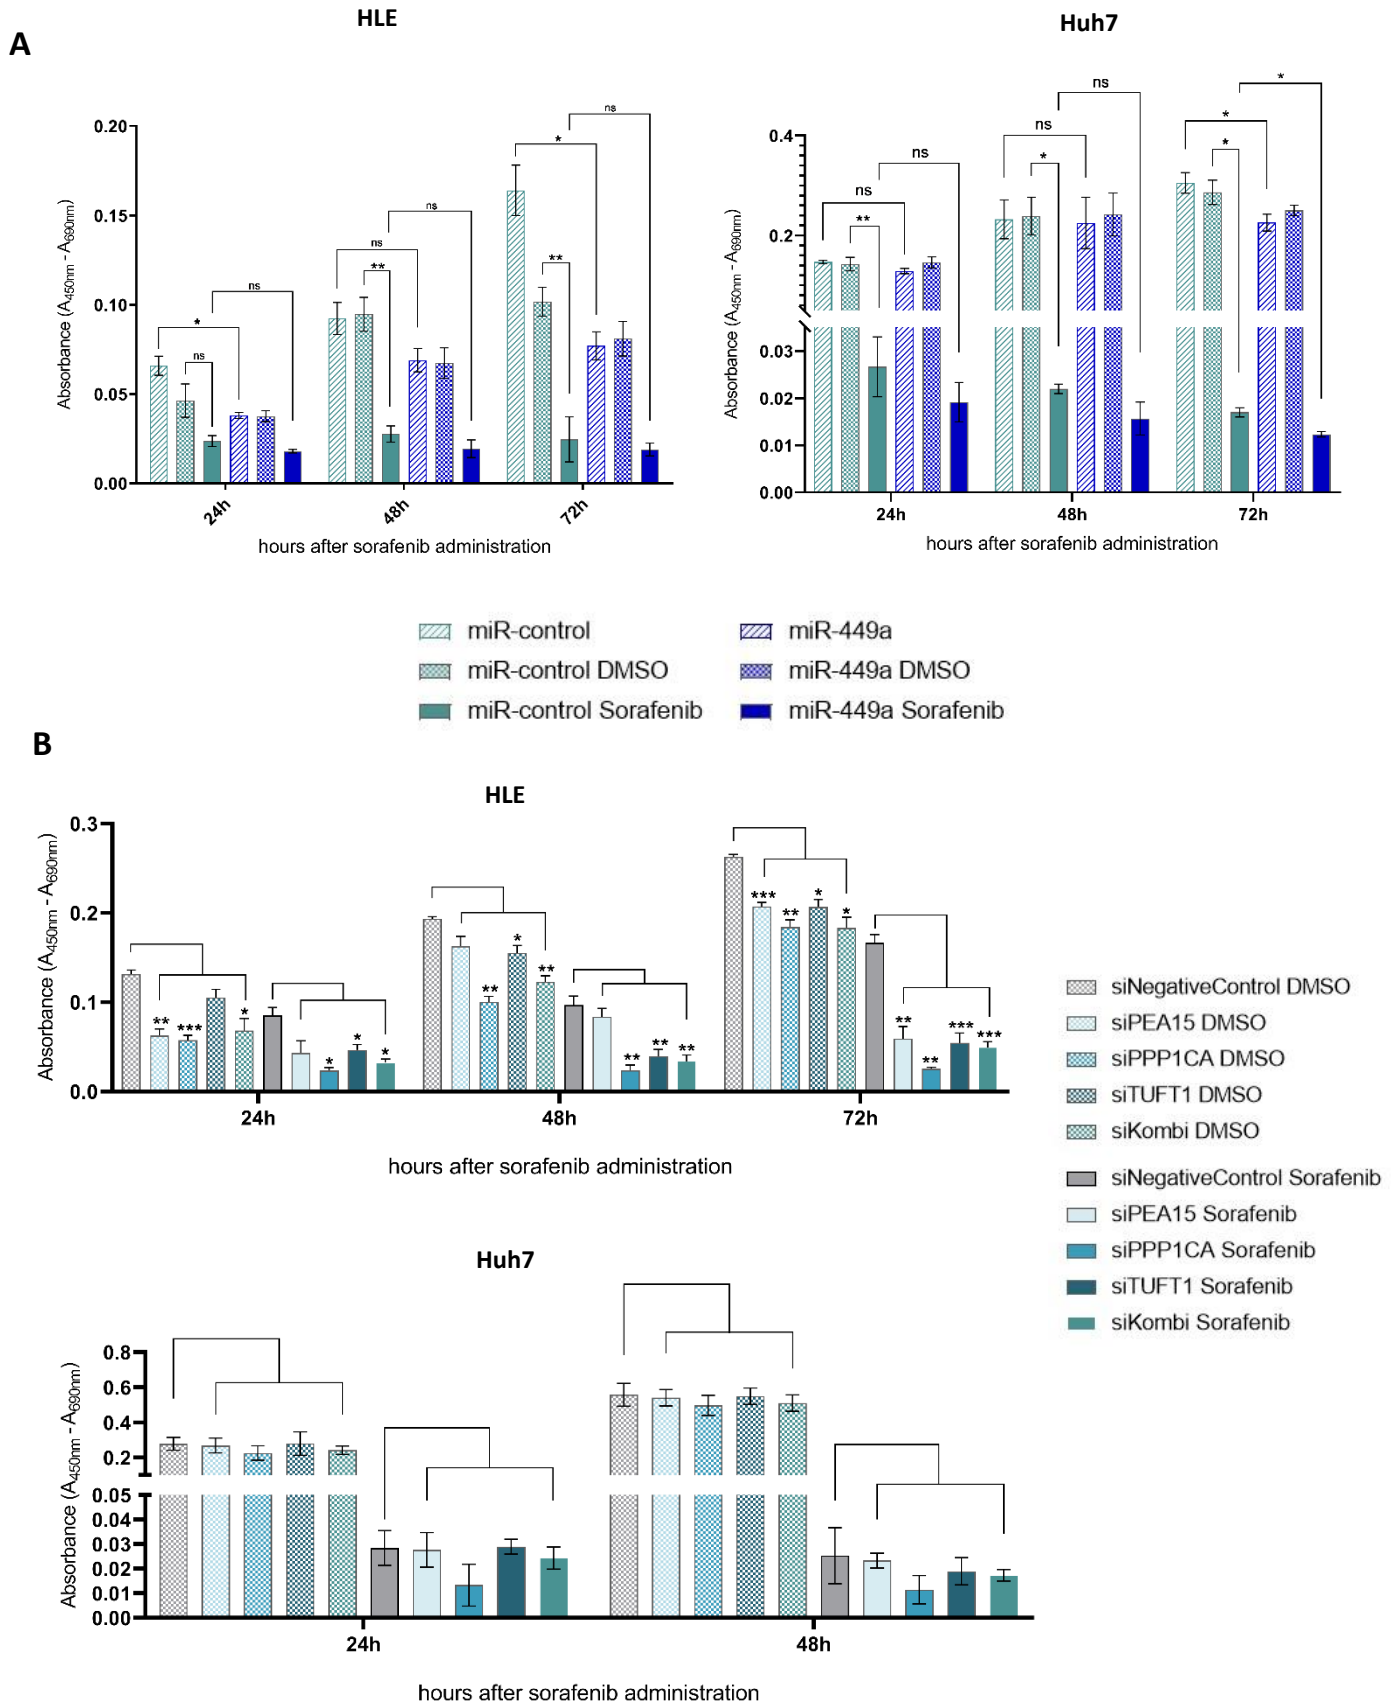

**Suppl. Fig. 2. MiR-449a-5p and knockdown of *PEA15*, *PPP1CA* and *TUFT1* increase sorafenib efficacy in HCC**

(A) HLE and Huh7 cells were transfected with miR-449a-5p mimic/ miR-control and treated with 10  $\mu$ M sorafenib or DMSO vehicle control. 24 h, 48 h and 72 h after sorafenib treatment cell viability was measured; two-way ANOVA with Tukey's multiple comparisons test (square brackets). (B) HLE and Huh7 cells were transfected with siRNA pools, either alone or in combination (siCombi) and treated with 10  $\mu$ M sorafenib or DMSO vehicle control. 24 h, 48 h and 72 h after sorafenib treatment cell viability was measured; \* $p$ <0.05, \*\* $p$ <0.01, \*\*\* $p$ <0.001, \*\*\*\* $p$ <0.0001; two-way ANOVA with Dunnett's multiple comparisons test (square brackets).

## Supplementary Tables

**Supplementary Table 1. Potential miR-449a-5p target genes identified by Ago-RIP-Seq**

| Nr. | Gene name |    |            |     |            |
|-----|-----------|----|------------|-----|------------|
| 1   | EIF3H     | 43 | ZC3H15     | 85  | CAV1       |
| 2   | PPARG     | 44 | PEA15      | 86  | HMGN2P5    |
| 3   | CDC26     | 45 | CCND1      | 87  | TGFBI      |
| 4   | IRF2BPL   | 46 | KAT2A      | 88  | HMGN2P3    |
| 5   | SOX4      | 47 | IDH3B      | 89  | AL139095.2 |
| 6   | RDH11     | 48 | TK1        | 90  | TUT1       |
| 7   | HMMR      | 49 | TPD52      | 91  | STRAP      |
| 8   | FTO       | 50 | SCAMP3     | 92  | DMAC1      |
| 9   | VAMP2     | 51 | MDH2       | 93  | C2orf74    |
| 10  | MDM4      | 52 | GAPDH      | 94  | SNX19      |
| 11  | CYREN     | 53 | PHB        | 95  | C3orf52    |
| 12  | FAM76A    | 54 | LDHA       | 96  | ARSJ       |
| 13  | LMAN2L    | 55 | HSPA1A     | 97  | BEX1       |
| 14  | TPM2      | 56 | HIF1A      | 98  | CCDC85B    |
| 15  | TUFT1     | 57 | TUFM       | 99  | TMA7       |
| 16  | LGR4      | 58 | GLB1       | 100 | RCC2       |
| 17  | PEX11B    | 59 | BCKDK      | 101 | NR3C1      |
| 18  | LINC00667 | 60 | USP11      | 102 | HMGN2P17   |
| 19  | SHMT2     | 61 | KIAA1191   | 103 | STIM1      |
| 20  | SEC23A    | 62 | MRTO4      | 104 | MRPL11     |
| 21  | TSPAN14   | 63 | RALBP1     | 105 | FAM204A    |
| 22  | LPIN3     | 64 | FOSL1      | 106 | E2F3       |
| 23  | RNF182    | 65 | HGS        | 107 | MPST       |
| 24  | AP1S1     | 66 | PGP        | 108 | ASNA1      |
| 25  | PANK2     | 67 | AL031729.1 | 109 | BOD1L1     |
| 26  | RPS3      | 68 | SOCS7      | 110 | PAFAH2     |
| 27  | ARL6IP1   | 69 | PRMT1      | 111 | KRT18P28   |
| 28  | CHMP1B    | 70 | AC027309.2 | 112 | SPRYD4     |
| 29  | NCSTN     | 71 | NOL8       | 113 | TBCB       |
| 30  | DBN1      | 72 | EFNA1      | 114 | RBBP4P1    |
| 31  | LRRC40    | 73 | HMGCS1     | 115 | RBM23      |
| 32  | PPP1CA    | 74 | Z82206.1   | 116 | CLASP2     |
| 33  | SLC25A39  | 75 | RPL3       | 117 | AL356000.1 |
| 34  | PNO1      | 76 | PPP4R2     | 118 | ARMC8      |
| 35  | MCM5      | 77 | NBL1       | 119 | PMF1       |
| 36  | PPIA      | 78 | RPL3P4     | 120 | PPIAP22    |
| 37  | GTF3C6    | 79 | GLTP       | 121 | DTYMK      |
| 38  | CSNK2A1   | 80 | ECPAS      | 122 | AXL        |
| 39  | TROAP     | 81 | DRAP1      | 123 | RPN2       |
| 40  | CFL1      | 82 | FDFT1      | 124 | MTFR1L     |
| 41  | NDC1      | 83 | RPLP0      | 125 | MPLKIP     |
| 42  | UBE2I     | 84 | HMGN2      | 126 | HK1        |



|     |              |     |         |
|-----|--------------|-----|---------|
| 127 | ERLIN1       | 164 | CORO1B  |
| 128 | HS2ST1       | 165 | FANCG   |
| 129 | PMS2P1       | 166 | TAGLN   |
| 130 | ZNF706       | 167 | LRR1    |
| 131 | MCM3         | 168 | PRR14   |
| 132 | PRPF39       | 169 | HMBS    |
| 133 | AC011481.1   | 170 | LDHAP4  |
| 134 | MAIP1        | 171 | CKAP2L  |
| 135 | BRD4         | 172 | PAPOLG  |
| 136 | EPB41L4A-AS1 | 173 | CLPB    |
| 137 | SIRT1        | 174 | LYRM4   |
| 138 | MYOCD        | 175 | PRKAR1B |
| 139 | LDHAP2       | 176 | KRT8P3  |
| 140 | IFRD2        | 177 | TPRKB   |
| 141 | MMAA         | 178 | CHCHD2  |
| 142 | MRPL19       | 179 | DDX10   |
| 143 | TRIM28       | 180 | SEMA3E  |
| 144 | DSN1         | 181 | PPIAP29 |
| 145 | SNHG5        | 182 | ARHGDI4 |
| 146 | FKBPL        |     |         |
| 147 | CIZ1         |     |         |
| 148 | SLC12A2      |     |         |
| 149 | LDHAP5       |     |         |
| 150 | ARL6IP5      |     |         |
| 151 | TM7SF3       |     |         |
| 152 | EDIL3        |     |         |
| 153 | PHF6         |     |         |
| 154 | GRIPAP1      |     |         |
| 155 | B3GNTL1      |     |         |
| 156 | ASNSD1       |     |         |
| 157 | KRI1         |     |         |
| 158 | TUBB         |     |         |
| 159 | AP2A2        |     |         |
| 160 | C19orf24     |     |         |
| 161 | LASP1        |     |         |
| 162 | VPS52        |     |         |
| 163 | CDCA5        |     |         |

MiR-449a-5p target genes were defined by positive log<sub>2</sub>FC values in contrast 1 and contrast2 and negative log<sub>2</sub>FC values in lysate (contrast 3). Therefore, Ago-RIP-Sequencing yielded 182 potential direct miR-449a-5p target genes that fulfilled those conditions in all three replicates.

## References

- [1] Quintavalle C, Hindupur SK, Quagliata L, Pallante P, Nigro C, Condorelli G, et al. Phosphoprotein enriched in diabetes (PED/PEA15) promotes migration in hepatocellular carcinoma and confers resistance to sorafenib. *Cell Death Dis* 2017;8:e3138–e3138. <https://doi.org/10.1038/cddis.2017.512>.
- [2] Agarwal V, Bell GW, Nam J-W, Bartel DP. Predicting effective microRNA target sites in mammalian mRNAs. *ELife* 2015;4:e05005. <https://doi.org/10.7554/eLife.05005>.
- [3] Mann M, Wright PR, Backofen R. IntaRNA 2.0: enhanced and customizable prediction of RNA–RNA interactions. *Nucleic Acids Research* 2017;45:W435–9. <https://doi.org/10.1093/nar/gkx279>.
